# Supplementary material for: The influence of the Li+ addition rate during the hydrothermal synthesis of LiFePO4 on the average and local structure
Source: Royal Society of Chemistry journal article supplement (doi:10.1039/d2dt01752k), 2022-01-01
Supplement: d2dt01752k5.pdf [file d2dt01752k5.pdf]

## Supporting Information

### **The influence of the Li<sup>+</sup> addition rate during the hydrothermal synthesis of LiFePO<sub>4</sub> on the average and local structure**

Michelle Thiebaut,<sup>a,b</sup> Caren Billing,<sup>a,b\*</sup> Deena Naidoo<sup>c</sup> and David G. Billing<sup>a,b</sup>

<sup>1</sup>Molecular Science Institute, School of Chemistry, University of the Witwatersrand, Private Bag X3, Johannesburg 2050, South Africa

<sup>2</sup>DST-NRF Centre of Excellence in Strong Materials, University of the Witwatersrand, Private Bag X3, 2050 Johannesburg, South Africa

<sup>3</sup>Material Physics Research Institute, School of Physics, University of the Witwatersrand, Private Bag X3, Johannesburg 2050, South Africa

\*Email: [caren.billing@wits.ac.za](mailto:caren.billing@wits.ac.za); Tel.: +27 11 717 6768

## 1. Homemade Teflon bombs

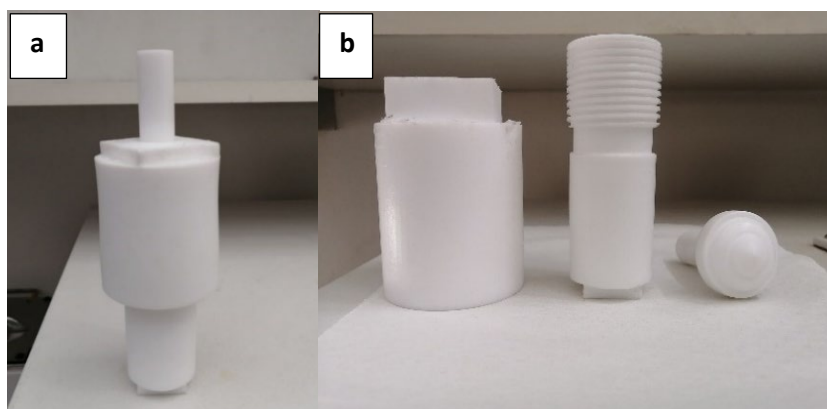

**Fig S1:** An example of the Teflon reaction vessels used for the hydrothermal synthesis which shows (a) the fully assembled and (b) the deconstructed components.

## 2. Rietveld refinement calibration plot

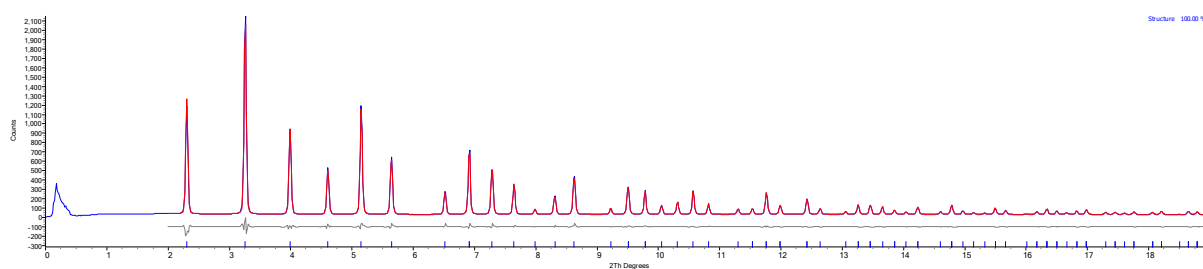

**Fig. S2** Rietveld refinement plot of the calibration plot of the 28-ID-1 BNL  $\text{LaB}_6$  (NIST 660c) sample.

**Table S1** Structural parameters extracted from the 28-ID-1 BNL  $\text{LaB}_6$  (NIST 660c) refinement.

| Structural parameter      | Refined value                                                               |
|---------------------------|-----------------------------------------------------------------------------|
| Wavelength / $\text{\AA}$ | 0.167057(4)                                                                 |
| R-factors                 | $R_{\text{wp}} = 4.06$<br>$R_{\text{p}} = 2.99$<br>$R_{\text{exp}} = 12.99$ |
| GOF                       | 0.31                                                                        |

### 3. Rietveld refinement plots of the varied Li<sup>+</sup> addition rate samples

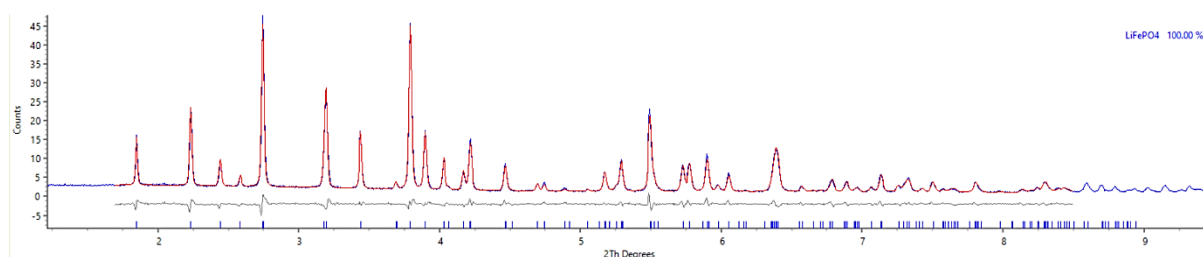

**Fig. S3** Rietveld refinement plot of the 1sec Li<sup>+</sup> addition rate sample.

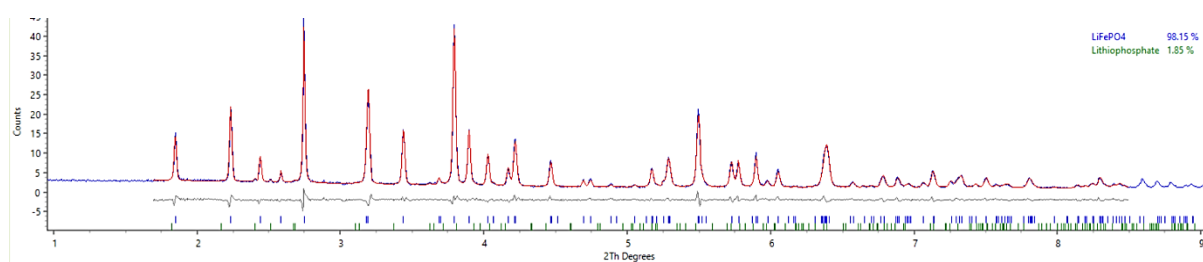

**Fig. S4** Rietveld refinement plot of the 3sec Li<sup>+</sup> addition rate sample.

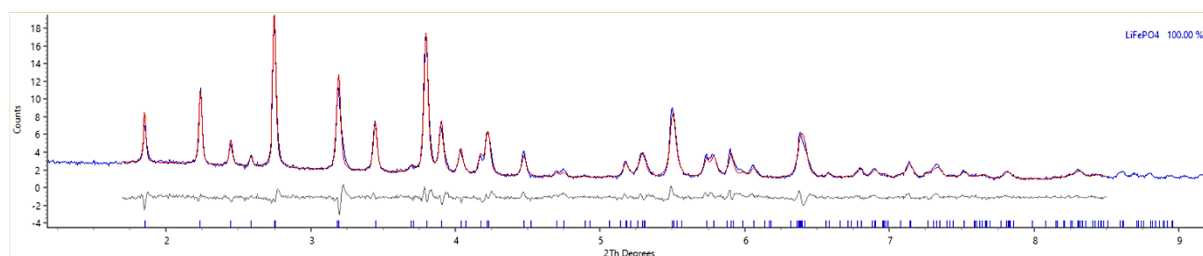

**Fig. S5** Rietveld refinement plot of the 4sec Li<sup>+</sup> addition rate sample.

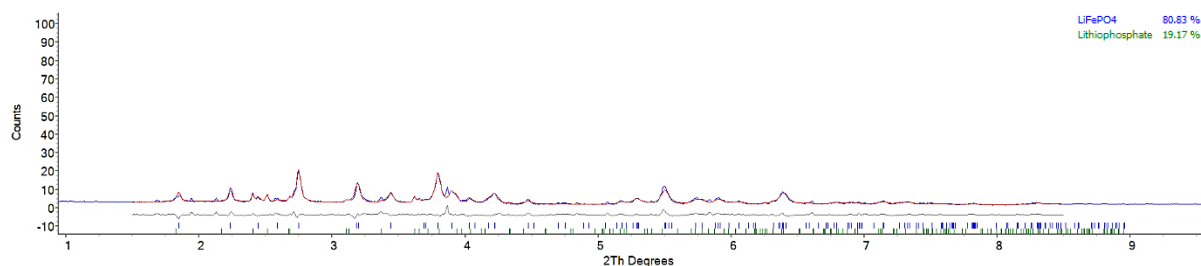

**Fig. S6** Rietveld refinement plot of the 5sec Li<sup>+</sup> addition rate sample.

Data from the Rietveld refinements are presented as the crystal and structural parameters in Table S2 and the fractional coordinates, site occupancy factors (S.O.F.) and the displacement parameters ( $B_{iso}$ ) of the LiFePO<sub>4</sub> phase in Tables S3-S6 for each sample. During each of the refinements the isotropic displacement parameters (thermal parameters,  $B_{iso}$ ) and site occupancy factors (S.O.F.'s) for Fe and Li were simultaneously refined as independent parameters and all refined to reasonable values. Additionally, the powder CIF files generated for each refinement are included as

supplementary information. These can readily be used to visualise the Rietveld refinement details using the program pdCIFplotter from Matthew Rowles (<https://doi.org/10.1107/S1600576722003478>) and for further details about each refinement.

**Table S2** The crystal and structural parameters as determined with the refinement of the Li<sup>+</sup> addition rate samples.

|                             | 1sec                                                                           | 3sec                                                                        | 4sec                                        | 5sec <sup>#</sup>                                                           |                                                                             |                                              |
|-----------------------------|--------------------------------------------------------------------------------|-----------------------------------------------------------------------------|---------------------------------------------|-----------------------------------------------------------------------------|-----------------------------------------------------------------------------|----------------------------------------------|
| Phase                       | LiFePO <sub>4</sub><br>(100 %)                                                 | LiFePO <sub>4</sub><br>(98.15%)                                             | Li <sub>3</sub> PO <sub>4</sub><br>(1.85 %) | LiFePO <sub>4</sub><br>(100 %)                                              | LiFePO <sub>4</sub><br>(80.83%)                                             | Li <sub>3</sub> PO <sub>4</sub><br>(19.17 %) |
| Crystal system              | Orthorho<br>mbic                                                               | Orthorhom<br>bic                                                            | Orthorhom<br>bic                            | Orthorhom<br>bic                                                            | Orthorhom<br>bic                                                            | Orthorhom<br>bic                             |
| Space group                 | Pnma                                                                           | Pnma                                                                        | Pnma                                        | Pnma                                                                        | Pnma                                                                        | Pnma                                         |
| Unit cell /Å                | a =<br>10.349(3)                                                               | a =<br>10.349(3)                                                            | a = 10.5(1)                                 | a =<br>10.329(8)                                                            | 10.34(2)                                                                    | 10.48(4)                                     |
|                             | b =<br>5.9940(2)                                                               | b =<br>5.9947(2)                                                            | b = 6.116(7)                                | b =<br>5.9899(5)                                                            | 5.989(1)                                                                    | 6.124(2)                                     |
|                             | c =<br>4.7066(1)                                                               | c =<br>4.7064(1)                                                            | c = 4.869(5)                                | c =<br>4.7022(4)                                                            | 4.6995(9)                                                                   | 4.864(2)                                     |
| Volume /Å <sup>3</sup>      | 291.97(2)                                                                      | 291.99(2)                                                                   | 312.206                                     | 290.92(4)                                                                   | 291.13(9)                                                                   | 312.066                                      |
| Density /g·cm <sup>-3</sup> | 3.68                                                                           | 3.67                                                                        | 2.46                                        | 3.67                                                                        | 3.73                                                                        | 2.93                                         |
| Strain (ε)                  | L* =<br>0.060(4)                                                               | L* =<br>0.055(3)                                                            | -                                           | L* = 0.46(2)<br>G* = 0.26(5)                                                | L* = 1.11(5)                                                                | G* = 0.38(6)                                 |
| R - factors                 | R <sub>wp</sub> = 7.23<br>R <sub>p</sub> = 5.72<br>R <sub>exp</sub> =<br>55.64 | R <sub>wp</sub> = 6.90<br>R <sub>p</sub> = 5.47<br>R <sub>exp</sub> = 57.09 |                                             | R <sub>wp</sub> = 8.11<br>R <sub>p</sub> = 6.23<br>R <sub>exp</sub> = 64.41 | R <sub>wp</sub> = 9.63<br>R <sub>p</sub> = 6.93<br>R <sub>exp</sub> = 52.20 |                                              |
| GOF                         | 0.13                                                                           | 0.12                                                                        |                                             | 0.13                                                                        | 0.18                                                                        |                                              |

<sup>#</sup> Percentages exclude the additional impurity phase

\* L = Lorentzian; G = Gaussian

**Table S3** The fractional coordinates, S.O.F. and B<sub>iso</sub> of the LiFePO<sub>4</sub> phase for the 1sec sample.

| Atom site | Atom type | Site symmetry | x       | y       | z       | S.O.F.  | B <sub>iso</sub> |
|-----------|-----------|---------------|---------|---------|---------|---------|------------------|
| Fe1       | Fe+2      | 4             | 0.28098 | 0.25    | 0.97442 | 0.99127 | 0.52017          |
| P1        | P         | 4             | 0.09492 | 0.25    | 0.41545 | 1       | 1.5              |
| O1        | O         | 4             | 0.09786 | 0.25    | 0.74253 | 1       | 0.71347          |
| O2        | O         | 4             | 0.44806 | 0.25    | 0.21121 | 1       | 0.50073          |
| O3        | O         | 8             | 0.16739 | 0.04026 | 0.2783  | 1       | 0.50122          |
| Li1       | Li        | 4             | 0       | 0       | 0       | 0.91139 | 1.48703          |
| Fe2       | Fe+3      | 4             | 0       | 0       | 0       | 0.08861 | 1.5              |

**Table S4** The fractional coordinates, S.O.F. and  $B_{\text{iso}}$  of the  $\text{LiFePO}_4$  phase for the 3sec sample.

| Atom site | Atom type | Site symmetry | x       | y       | z       | S.O.F.  | $B_{\text{iso}}$ |
|-----------|-----------|---------------|---------|---------|---------|---------|------------------|
| Fe1       | Fe+2      | 4             | 0.28114 | 0.25    | 0.97448 | 0.99035 | 0.51253          |
| P1        | P         | 4             | 0.09424 | 0.25    | 0.41476 | 1       | 1.5              |
| O1        | O         | 4             | 0.09722 | 0.25    | 0.74255 | 1       | 0.6624           |
| O2        | O         | 4             | 0.44785 | 0.25    | 0.21201 | 1       | 0.59955          |
| O3        | O         | 8             | 0.16717 | 0.04047 | 0.27862 | 1       | 0.50122          |
| Li1       | Li        | 4             | 0       | 0       | 0       | 0.91183 | 1.48703          |
| Fe2       | Fe+3      | 4             | 0       | 0       | 0       | 0.08817 | 1.5              |

**Table S5** The fractional coordinates, S.O.F. and  $B_{\text{iso}}$  of the  $\text{LiFePO}_4$  phase for the 4sec sample.

| Atom site | Atom type | Site symmetry | x       | y       | z       | S.O.F.  | $B_{\text{iso}}$ |
|-----------|-----------|---------------|---------|---------|---------|---------|------------------|
| Fe1       | Fe+2      | 4             | 0.27942 | 0.25    | 0.97185 | 0.96313 | 0.95644          |
| P1        | P         | 4             | 0.09343 | 0.25    | 0.41267 | 1       | 1.5              |
| O1        | O         | 4             | 0.10028 | 0.25    | 0.74696 | 1       | 1.34993          |
| O2        | O         | 4             | 0.44154 | 0.25    | 0.20807 | 1       | 0.50073          |
| O3        | O         | 8             | 0.16626 | 0.03318 | 0.27865 | 1       | 0.50122          |
| Li1       | Li        | 4             | 0       | 0       | 0       | 0.89893 | 0.61203          |
| Fe2       | Fe+3      | 4             | 0       | 0       | 0       | 0.10107 | 0.63631          |

**Table S6** The fractional coordinates, S.O.F. and  $B_{\text{iso}}$  of the  $\text{LiFePO}_4$  phase for the 5sec sample.

| Atom site | Atom type | Site symmetry | x       | y       | z       | S.O.F.  | $B_{\text{iso}}$ |
|-----------|-----------|---------------|---------|---------|---------|---------|------------------|
| Fe1       | Fe+2      | 4             | 0.27791 | 0.25    | 0.9681  | 0.9534  | 0.71598          |
| P1        | P         | 4             | 0.08906 | 0.25    | 0.41294 | 1       | 1.5              |
| O1        | O         | 4             | 0.10384 | 0.25    | 0.75173 | 1       | 1.4375           |
| O2        | O         | 4             | 0.43413 | 0.25    | 0.21655 | 1       | 0.50073          |
| O3        | O         | 8             | 0.16792 | 0.02747 | 0.27849 | 1       | 0.50122          |
| Li1       | Li        | 4             | 0       | 0       | 0       | 0.83122 | 0.61203          |
| Fe2       | Fe+3      | 4             | 0       | 0       | 0       | 0.16878 | 0.5625           |

#### 4. The bond valence sum to determine the oxidation state

The valence ( $v$ ) of Fe was calculated using the average bond distance ( $d$ ) as follows:

$$v = e^{(R_0 - d)/B}$$

where  $R_0$  and  $B$  are the bond valence parameters;  $B$  is considered as universal whereas  $R_0$  depends on the atom identity. As recommended<sup>1,2</sup> the values of  $B = 0.37 \text{ \AA}$  and  $R_0 = 1.745 \text{ \AA}$  were used, where the latter was chosen based on the premise that the oxidation state of Fe is unknown. The values for  $d$  were obtained from Table 2 in the manuscript (i.e. the Fe-O interatomic distance). In an octahedral arrangement, the bond valence sum (BVS) is  $6v$  and the results are shown in Table S3.

**Table S7** A summary of the bond valence sum for the different addition rate samples using the above-mentioned equation.

| Sample | Valence | Bond valence sum |
|--------|---------|------------------|
| 1sec   | 0.345   | 2.07             |
| 3sec   | 0.348   | 2.09             |
| 4sec   | 0.370   | 2.22             |
| 5sec   | 0.390   | 2.34             |

### 5. Mössbauer fits and $\chi^2$ – values determined using Vinda

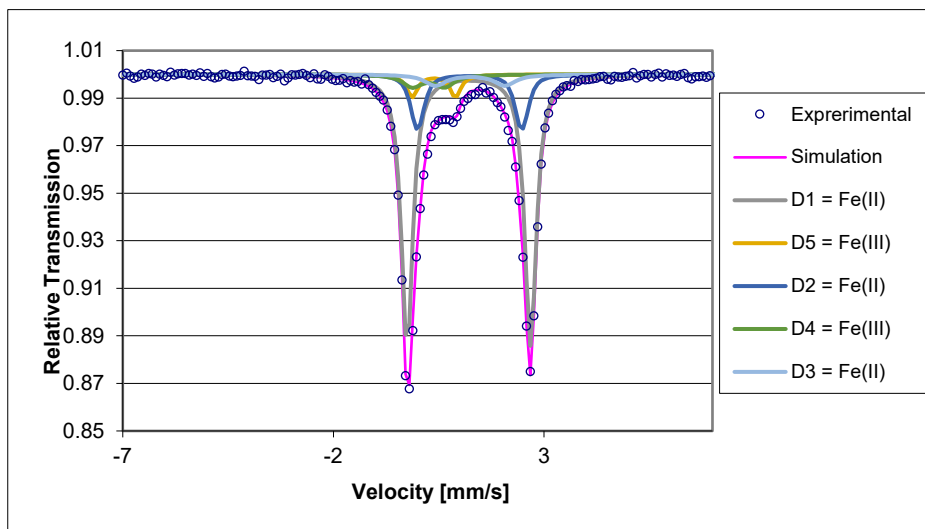

**Fig. S7** Mössbauer spectrum of the 1sec sample as determined using Vinda.

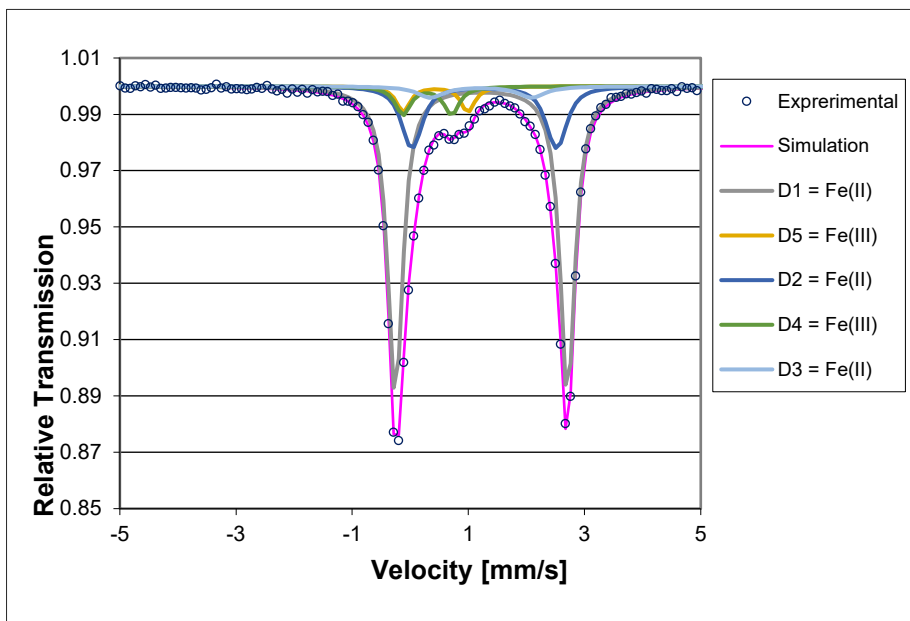

**Fig. S8** Mössbauer spectrum of the 3sec sample as determined using Vinda.

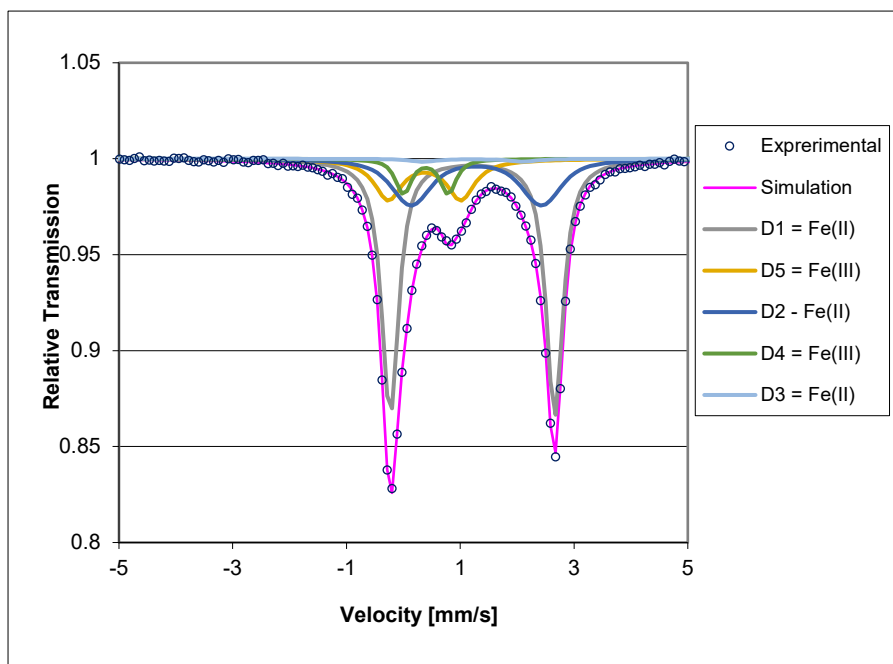

**Fig. S9** Mössbauer spectrum of the 4sec sample as determined using Vinda.

**Table S8** The  $\chi^2$  values indicating the goodness-of-fit for the Mössbauer spectra.

| Sample | $\chi^2$ |
|--------|----------|
| 1sec   | 1.43     |
| 3sec   | 1.36     |
| 4sec   | 1.04     |

## 6. EXAFS structural plots as determined using Artemis

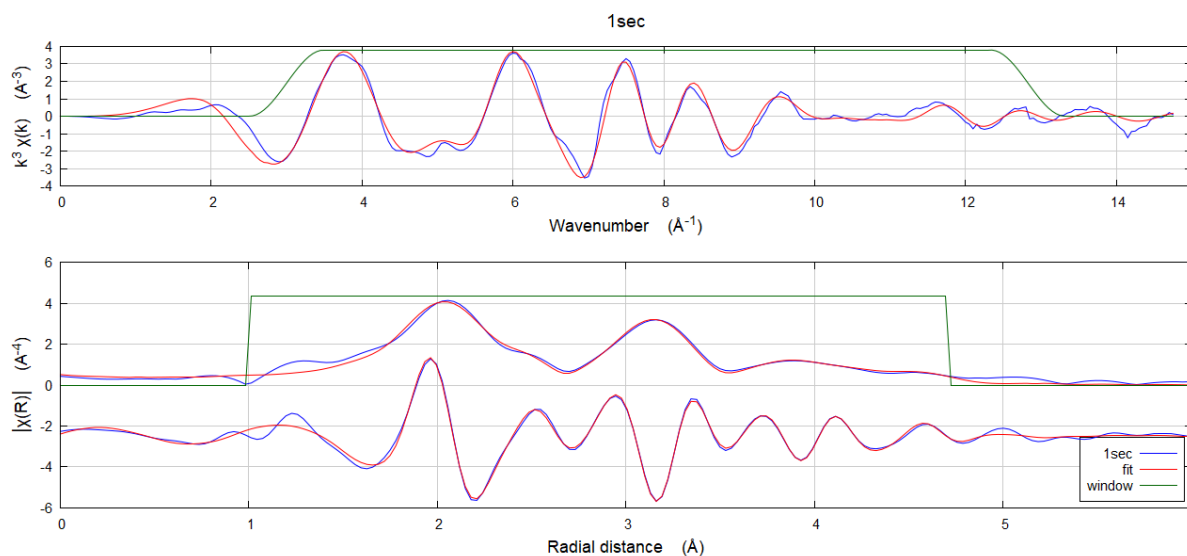

**Fig. S10** The k-space, magnitude and real space of the Fourier Transform plots of the 1sec sample showing the experimental data, the fit and the range of the fitting window.

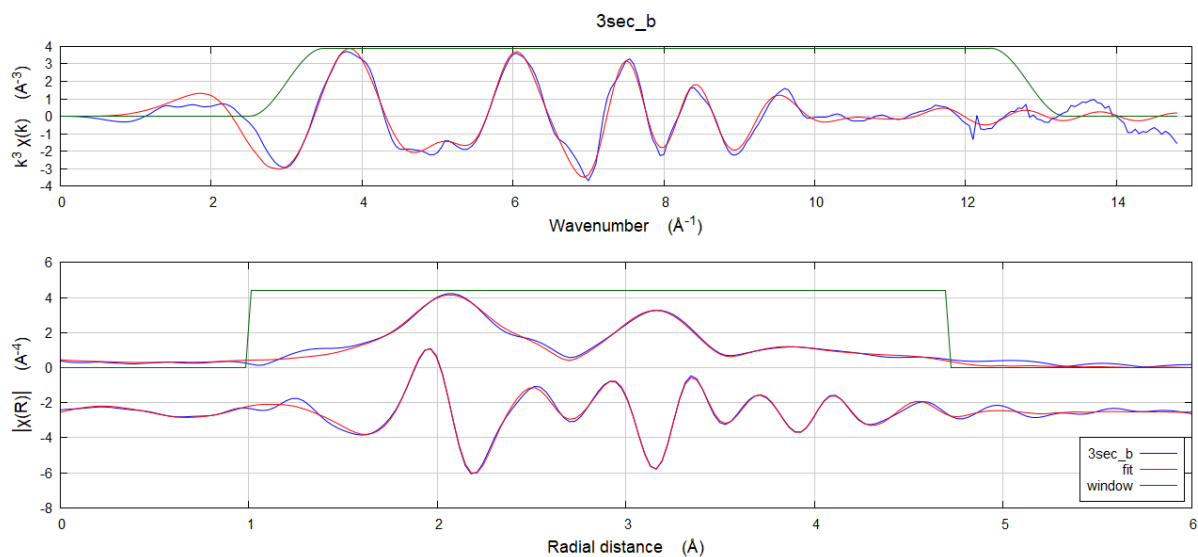

**Fig. S11** The k-space, magnitude and real space of the Fourier Transform plots of the 3sec sample showing the experimental data, the fit and the range of the fitting window.

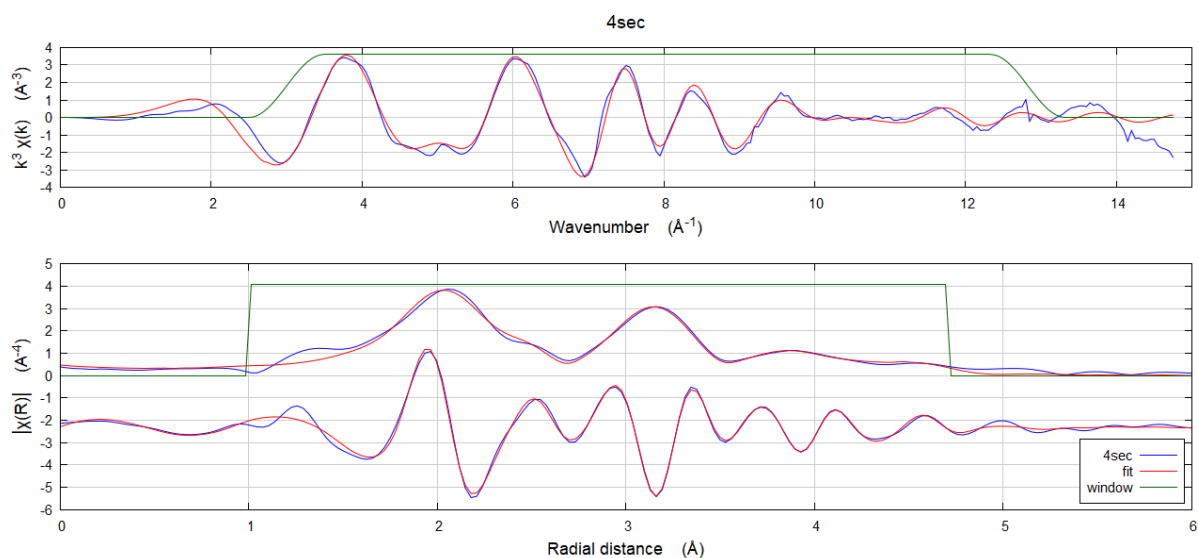

**Fig. S12** The k-space, magnitude and real space of the Fourier Transform plots of the 4sec sample showing the experimental data, the fit and the range of the fitting window.



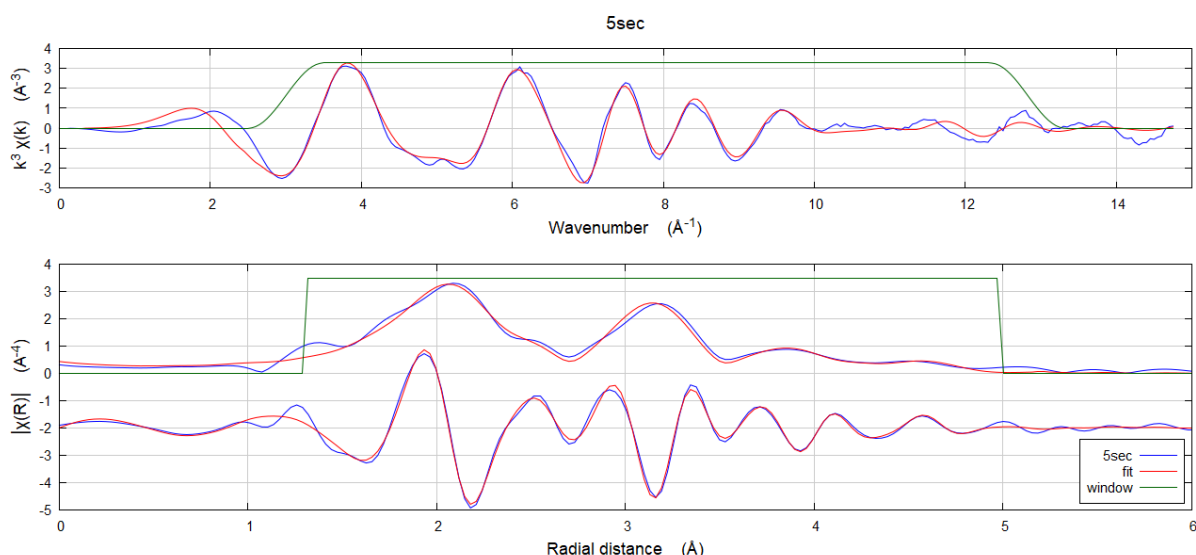

**Fig. S13** The k-space, magnitude and real space of the Fourier Transform plots of the 5sec sample showing the experimental data, the fit and the range of the fitting window.

**Table S9** Selected structural parameters extracted from the EXAFS fit of the different Li<sup>+</sup> addition rate samples.

|                   | 1sec    | 3sec    | 4sec    | 5sec    |
|-------------------|---------|---------|---------|---------|
| R-factor (%)      | 0.44    | 0.45    | 0.35    | 0.58    |
| $S_0^2$           | 0.83(6) | 0.90(9) | 0.83(6) | 0.76(2) |
| $\Delta E_0$ (eV) | -0.8(8) | 0.9(8)  | -0.3(8) | -2.8(8) |

In the EXAFS analyse 23 independent points were used to fit 14 parameters.

## 7. LiFePO<sub>4</sub> reference material

A commercially bought LiFePO<sub>4</sub> sample (Sigma Aldrich, >97%) was used as a reference material to compare the XANES region. In order to understand the characteristics of this material, the structure was also further analysed by other techniques where some were used in this study. An unidentified additional phase was detected in this material using PXRD (Fig. S13), Mössbauer spectroscopy (Fig. S14) and Raman spectroscopy (Fig. S16 and S17). The sextet environments found in the Mössbauer spectrum indicate that this additional phase could be Fe<sup>3+</sup>-containing. Error indices extracted from a Rietveld refinement of the reference material can be found in Table S5. The lattice parameters and unit cell volume (Table S6) were comparable to those determined by other groups (Table S6), indicating that the impurity present does not have a large effect on the lattice parameters or volume. The higher R-factor for the EXAFS analysis can be due to the exclusion of this phase especially if this phase is Fe-containing (Fig. S15 and Table S8).

## 7.1. PXRD

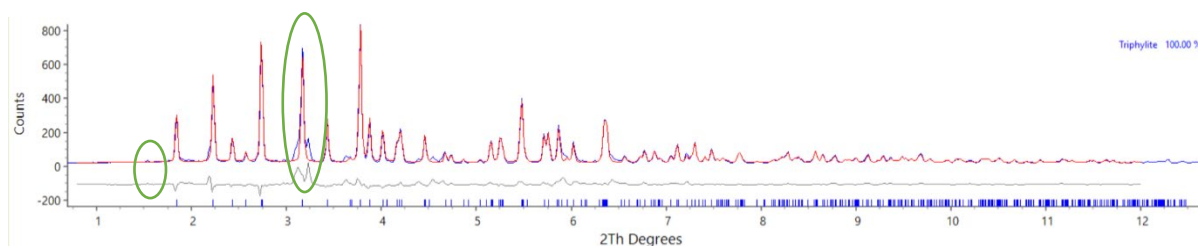

**Fig. S14** Rietveld refinement plot of the reference  $\text{LiFePO}_4$  sample. The impure phase/s is indicated with green on the diffractogram.

**Table S10** Structural parameters extracted from a Rietveld refinement of the reference material.

|           |       |
|-----------|-------|
| $R_{wp}$  | 15.17 |
| $R_p$     | 13.42 |
| $R_{exp}$ | 9.20  |
| GOF       | 1.13  |

**Table S11** The lattice parameters and volume of  $\text{LiFePO}_4$  reference material compared to other synthesised  $\text{LiFePO}_4$  materials.

| Reference                            | $a / \text{\AA}$ | $b / \text{\AA}$ | $c / \text{\AA}$ | Volume / $\text{\AA}^3$ |
|--------------------------------------|------------------|------------------|------------------|-------------------------|
| $\text{LiFePO}_4$ reference material | 10.329(9)        | 6.0086(5)        | 4.6916(4)        | 291.19(4)               |
| Prince <i>et al.</i> <sup>3</sup>    | 10.3095(7)       | 5.9993(4)        | 4.6932(3)        | 290.27(3)               |
| Kuwahara <i>et al.</i> <sup>4</sup>  | 10.3280(5)       | 6.0040(3)        | 4.6936(2)        | 291.05(2)               |
| Chen <i>et al.</i> <sup>5</sup>      | 10.334           | 6.004            | 4.694            | 291.24                  |

## 7.2. Mössbauer spectroscopy

Three Voigt doublet (D1 – D3) environments were identified and two Lorentzian sextets (S1 – S2) were also added to improve the fit, but these did not account for all the smaller peaks on either side of the doublet. D1 was identified as  $\text{Fe}^{2+}$  in  $\text{LiFePO}_4$ ,<sup>6,7</sup> D2 was also identified  $\text{Fe}^{2+}$  in  $\text{LiFePO}_4$  but in a more distorted octahedra<sup>8</sup> and D3 was identified as  $\text{Fe}^{3+}$  on the M1 site.<sup>8,9</sup> The parameters for the sextets did not match those of  $\alpha\text{-Fe}_2\text{O}_3$ <sup>9</sup> and  $\text{Fe}_3\text{O}_4$ .<sup>10</sup>

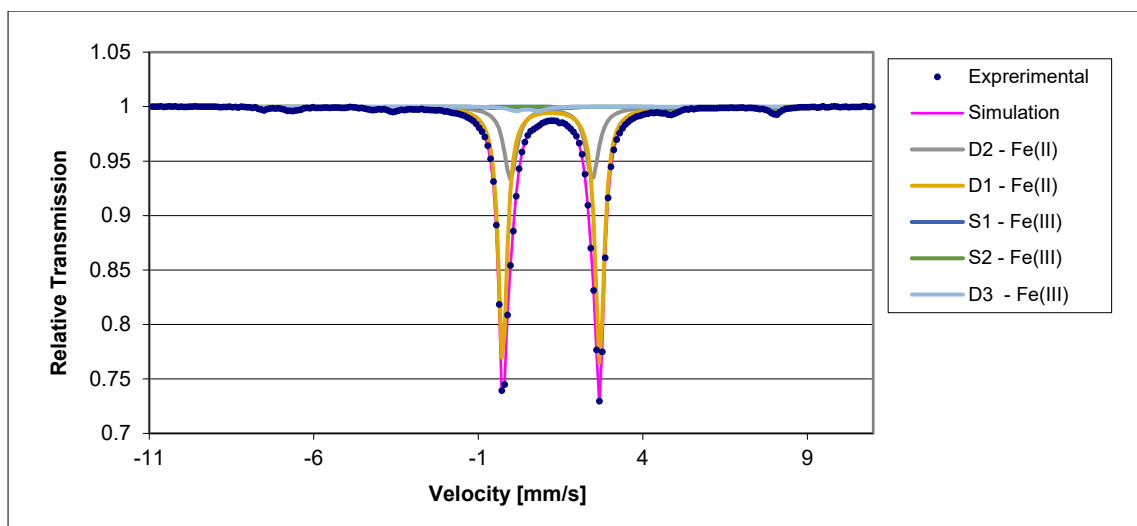

**Fig. S15** Mössbauer spectrum of the  $\text{LiFePO}_4$  reference material as determined using Vinda. D refers to the different doublets and S refers to the different sextet environments.  $\chi^2 = 9.61$ .

**Table S12** Mössbauer parameters and area percentages of  $\text{LiFePO}_4$  the reference material.

| Fe environment | Isomer shift<br>( $\delta$ – mm/s) | Quadrupole splitting<br>( $\Delta E_Q$ – mm/s) | Percentage area (%) |
|----------------|------------------------------------|------------------------------------------------|---------------------|
| D1 – Fe(II)    | 1.22(1)                            | 2.95(1)                                        | 66(5)               |
| D2 – Fe(II)    | 1.22(1)                            | 2.49(1)                                        | 26(2)               |
| D3 – Fe(II)    | 0.48(1)                            | 0.69(1)                                        | 2(1)                |
| S1 – Fe(III)   | 0.26(1)                            | -0.01(1)                                       | 2(1)                |
| S1 – Fe(III)   | 0.62(1)                            | 0.08(1)                                        | 4(1)                |

### 7.3. EXAFS

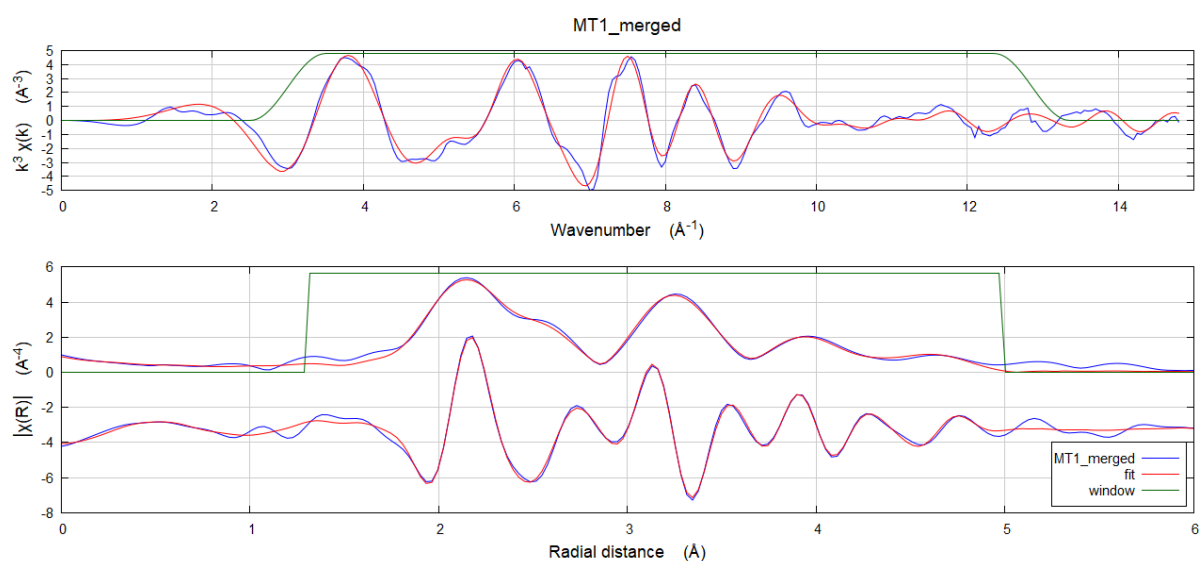

**Fig. S16** The k-space, magnitude and real space of the Fourier Transform plots of the  $\text{LiFePO}_4$  reference material showing the experimental data, the fit and the range of the fitting window.

**Table S13** Selected structural parameters extracted from the EXAFS fit for the LiFePO<sub>4</sub> reference material.

|                   | LiFePO <sub>4</sub> reference material |
|-------------------|----------------------------------------|
| R-factor (%)      | 0.86                                   |
| $S_0^2$           | 0.91(8)                                |
| $\Delta E_0$ (eV) | 0.22(10)                               |

#### 7.4. Raman spectroscopy

Two different coloured particulates were identified using Raman spectroscopy. The major phase was white (Fig. S16a) whereas the minor phase was black (Fig. S16b). The vibrational modes were identified for both phases. These modes were compared to the modes identified by Burba and Frech,<sup>11</sup> Paraguassu *et al.*<sup>12</sup> and Wu *et al.*<sup>13</sup> and the modes identified for the reference material is summarised in Table S9. LiFePO<sub>4</sub> was the major phase present in both coloured particulates. Three impurity phases were also detected, but one of those phases remained unidentified. Two modes can be associated with Fe<sub>3</sub>O<sub>4</sub><sup>14</sup> although no other peaks were found for this impurity (shaded in green). Some modes can be associated with  $\alpha$ -Fe<sub>2</sub>O<sub>3</sub><sup>14</sup> (shaded in orange). These phases were included in the Mössbauer spectroscopy analysis. The hyperfine parameters for these phases did not improve the fit. The hyperfine parameters for the doublet identified as D3 also corresponds to the hyperfine parameters of superparamagnetic hematite.<sup>15</sup> This could possibly be the hematite detected in the samples.

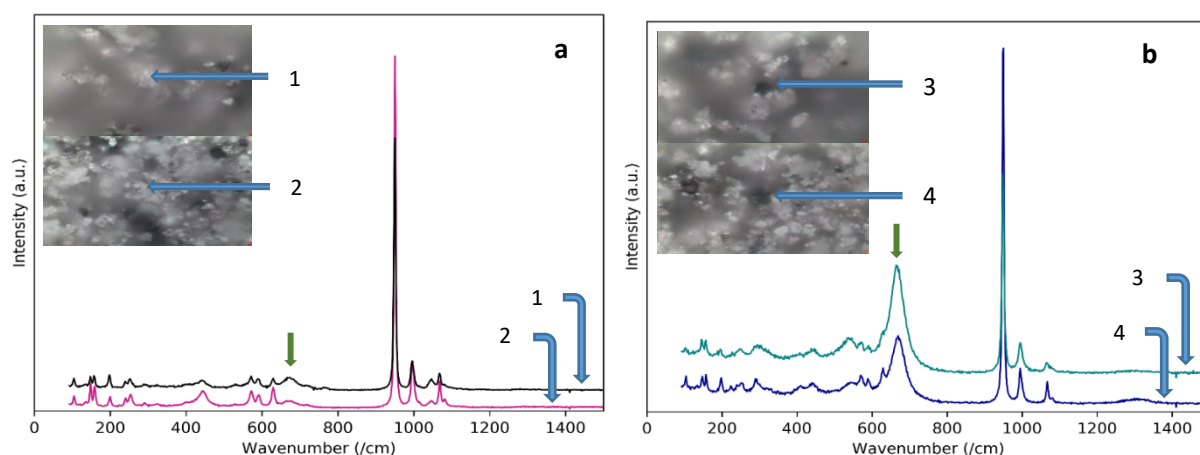

**Fig. S17** Raman spectra for the LiFePO<sub>4</sub> reference material. Sampled areas consisted of (a) white particulates (labelled as 1 and 2) and (b) black particulates (labelled as 3 and 4). The green arrows indicate the intense peak that could be associated with Fe<sub>3</sub>O<sub>4</sub>.

**Table S14** Raman modes for the white and black particulates present in the LiFePO<sub>4</sub> reference material. LiFePO<sub>4</sub> modes are shaded in blue, α-Fe<sub>2</sub>O<sub>3</sub> in orange, Fe<sub>3</sub>O<sub>4</sub> in green and the unidentified phases are not shaded.

| Wavenumbers(/cm) |         |         |         | Assignment                                                                         |
|------------------|---------|---------|---------|------------------------------------------------------------------------------------|
| LFP (1)          | LFP (2) | LFP (3) | LFP (4) |                                                                                    |
| 104              | 104     | 103     | 102     | PO <sub>4</sub> <sup>3-</sup> rotational and Fe <sup>2+</sup> translational motion |
| 134*             |         | 134*    |         |                                                                                    |
| 148              | 147     | 147     | 146     |                                                                                    |
| 158              | 157     | 157     | 156     |                                                                                    |
| 199              | 197     | 197     | 195     |                                                                                    |
|                  |         | 223     | 227     |                                                                                    |
| 240              | 239     |         |         |                                                                                    |
| 253              | 251     | 254     | 247     |                                                                                    |
| 290              | 289     | 291     | 299     |                                                                                    |
|                  |         | 408     |         |                                                                                    |
| 444              | 443     | 441     | 442     | v <sub>2</sub> (PO <sub>4</sub> <sup>3-</sup> )                                    |
|                  | 530     | 549     |         |                                                                                    |
| 571              | 571     | 571     | 571     | v <sub>4</sub> (PO <sub>4</sub> <sup>3-</sup> )                                    |
| 591              | 589     | 590     | 591     |                                                                                    |
| 629              | 629     | 628     | 626     |                                                                                    |
| 672              | 672     | 669     | 667     |                                                                                    |
| 719*             | 720*    |         |         | v <sub>1</sub> (PO <sub>4</sub> <sup>3-</sup> )                                    |
| 949              | 950     | 948     | 947     |                                                                                    |
| 998              | 998     | 995     | 995     | v <sub>3</sub> (PO <sub>4</sub> <sup>3-</sup> )                                    |
| 1045*            | 1045*   |         |         |                                                                                    |
| 1068             | 1067    | 1066    | 1067    |                                                                                    |
| 1082*            |         | 1080*   |         |                                                                                    |
|                  |         | 1306    | 1307    |                                                                                    |

## 8. References

1. S. M. Kanowitz and G.J. Palenik, *Inorg. Chem.*, 1998, **37**, 2086–2088.
2. S. Z. Hu and Z. H. Zhou, *Zeitschrift fur Krist.*, 2004, **219**, 614–620.
3. A. A. M. Prince, S. Mylswamy, T. S. Chan, R. S. Liu, B. Hannoyer, M. Jean, C.H. Shen, S. M. Huang, J. F. Lee and G. X. Wang, *Solid State Commun.*, 2004, **132**, 455–458.
4. A. Kuwahara, S. Suzuki and M. Miyayama. *J. Electroceramics*, 2010, **24**, 69–75.
5. J. Chen, S. Wang and M. S. Whittingham, *J. Power Sources*, 2007, **174**, 442–448.
6. M. Maccario, L. Croguennec, A. Wattiaux, E. Suard, F. Le Cras and C. Delmas, *Solid State Ionics*, 2008, **179**, 2020–2026.
7. A. Yamada, S. C. Chung and K. Hinokuma. *J. Electrochem. Soc.*, 2001, **148**, A224.
8. R. Amisse, M. Sougrati, L. Stievano, C. Davoisne, G. Dražič, B. Budič, R. Dominko and C. Masquelier, *Chem. Mater.*, 2015, **27**, 4261–4273.
9. S. Hamelet, P. Gibot, M. Casas-Cabanas, D. Bonnin, C. P. Grey, J. Cabana, J. B. Leriche, J. Rodriguez-Carvajal, M Courty, S. Levasseur, P. Carlach, M. Van Thournout, J. M.

- Tarascon and C. Masquelier, *J. Mater. Chem.*, 2009, **19**, 3979–3991.
10. J. Winsett, A. Moilanen, K. Paudel, S. Kamali, K. Ding, W. Cribb, D. Seifu, S. Neupane. *SN Appl. Sci.*, 2019, **1**, 1–8.
  11. C. M. Burba and R. Frech. Raman and FTIR Spectroscopic Study of  $\text{Li}_x\text{FePO}_4$  ( $0 \leq x \leq 1$ ). *J. Electrochem. Soc.*, 2004, **151**, A1032.12. W. Paraguassu, P. T. C. Freire, V. Lemos, S. M. Lala, L. A. Montoro and J. M. Rosolen. *J. Raman Spectrosc.*, 2005, **36**, 213–220.
  13. J. Wu, G. Krishna Phani Dathar, C. Sun, M. G. Theivanayagam, D. Applestone, A. G. Dylla, A. Manthiram, G. Henkelman, J. B. Goodenough, J. B. and K. J. Stevenson. *IOP Publ. Nanotechnol. Nanotechnol.*, 2013, **24**, 424009–424018.
  14. D. L. A. de Faria and F. N. Lopes. *Vib. Spectrosc.*, 2007, **45**, 117–121.
  15. L. C. Sánchez, J. D. Arboleda, C. Saragovi, R. D. Zysler and C. A. Barrero. *Phys. B Condens. Matter*, 2007, **389**, 145–149.
